# Supplementary material for: Flight Phenology of Elasmopalpus lignosellus (Lepidoptera: Pyralidae) in the Northwest Florida Panhandle
Source: MDPI journal article supplement (doi:10.3390/insects14040354), 2023-04-02
Supplement: s1 [file s1]

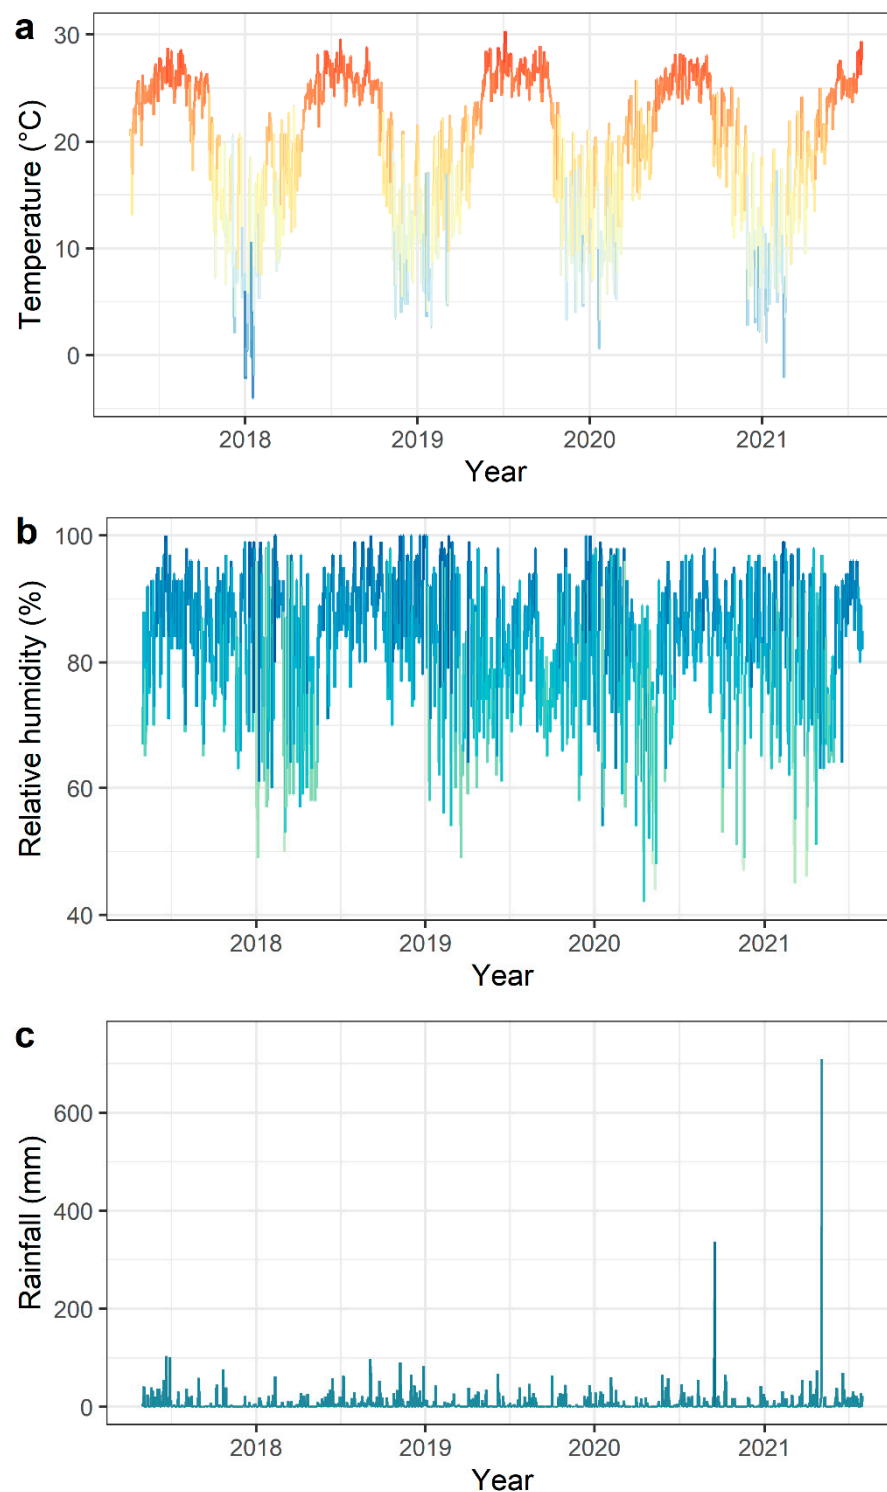

**Figure S1.** (a) Average daily temperature and (b) relative humidity, and (c) accumulated rainfall during the evaluation period, from Jul/2017 to Jun/2021, at Jay, Santa Rosa County, Florida.
